# Supplementary material for: Shape Memory Respirator Mask for Airborne Viruses
Source: MDPI journal article supplement (doi:10.3390/polym15081859), 2023-04-13
Supplement: s1 [file s1]

# Shape Memory Respirator Mask for Airborne Viruses

Kosisochi Ibebunjo <sup>1,\*</sup>, Susanna Tella <sup>2</sup>, Samantha Kiljunen <sup>1</sup> and Eveliina Repo <sup>1</sup>

<sup>1</sup>School of Engineering Science, Department of Separation Science, LUT University,  
FI-53850 Lappeenranta, Finland

<sup>2</sup>Faculty of Health Care and Social Services, LAB University of Applied Sciences,  
FI-53850 Lappeenranta, Finland

\* Correspondence: kosisochi.ibebunjo@lut.fi

**Table S1.** Summary of the mechanical properties of PP/PCL blends obtained from tensile tests [30].

| Sample    | Elastic Modulus (MPa) | Tensile Strength (MPa) | Elongation at Break (%) |
|-----------|-----------------------|------------------------|-------------------------|
| PP100     | 1866 ± 350            | 38.3 ± 2.3             | 926 ± 1                 |
| PP90PCL10 | 1234 ± 70             | 28.5 ± 4.2             | 926 ± 1                 |
| PP80PCL20 | 1117 ± 80             | 25.4 ± 1.3             | 926 ± 1                 |
| PP70PCL30 | 890 ± 80              | 27.6 ± 6               | 549 ± 247               |
| PCL100    | 327.4 ± 10            | 19.3 ± 1.5             | 926 ± 1                 |

**Table S2.** Summary of the mechanical properties of PP/PCL/PP-g-ma blends obtained from tensile tests [30].

| Sample         | Elastic Modulus (MPa) | Tensile Strength (MPa) | Elongation at Break (%) |
|----------------|-----------------------|------------------------|-------------------------|
| PP90PCL10C10   | 1233 ± 90             | 30.2 ± 1.5             | 32.7 ± 26.3             |
| PP90PCL10C5    | 1540 ± 268            | 30.7 ± 5.38            | 98.9 ± 51.7             |
| PP90PCL10C1.25 | 1356 ± 77             | 32.3 ± 1.1             | 104.3 ± 32.4            |
| PP80PCL20C10   | 1160 ± 140            | 30.1 ± 0.6             | 65.8 ± 9.7              |
| PP80PCL20C5    | 1457 ± 106            | 30.7 ± 5.7             | 178.8 ± 158             |
| PP80PCL20C1.25 | 1402 ± 46             | 33.5 ± 0.8             | 80.3 ± 12.5             |
| PP70PCL30C10   | 1152 ± 140            | 27.7 ± 3.8             | 134 ± 46.4              |
| PP70PCL30C5    | 1424 ± 173            | 31.4 ± 3.6             | 69.3 ± 15.7             |
| PP70PCL30C1.25 | 1307 ± 52             | 32.0 ± 1.4             | 116.8 ± 36.3            |

**Table S3.** Summary of the mechanical properties of PLA/PCL blends obtained from tensile tests [30].

| Sample     | Tensile Strength (MPa) | Elastic Modulus (MPa) | Elongation at Break (%) |
|------------|------------------------|-----------------------|-------------------------|
| PLA100     | 58.4 ± 4.3             | 2883 ± 220            | 8.62 ± 3.9              |
| PLA90PCL10 | 52.8 ± 9.3             | 3087 ± 440            | 13.2 ± 2.0              |
| PLA80PCL20 | 44.5 ± 1               | 2628 ± 76             | 17.9 ± 7.5              |
| PLA70PCL30 | 37.8 ± 4.7             | 2252 ± 73             | 535 ± 0.3               |
| PLA60PCL40 | 32.8 ± 5.7             | 1989 ± 510            | 127 ± 99.2              |
| PLA50PCL50 | 25.2 ± 3.5             | 1604 ± 276            | 225.2 ± 78.7            |
| PCL100     | 19.3 ± 1.5             | 327.4 ± 10            | 926 ± 1                 |

**Table S4.** Summary of the mechanical properties of PP/PCL/P-123blends obtained from tensile tests [30].

| Sample         | Tensile Strength (MPa) | Elastic Modulus (MPa) | Elongation at Break (%) |
|----------------|------------------------|-----------------------|-------------------------|
| PLA80PCL20C2.5 | 39.3 ± 20.3            | 2555 ± 216            | 54.7 ± 38.9             |
| PLA80PCL20C5   | 45.3 ± 2.6             | 2710 ± 170            | 41.0 ± 34.4             |
| PLA80PCL20C7.5 | 41.7 ± 1.9             | 2609 ± 285            | 25.6 ± 9.1              |
| PLA80PCL20C10  | 33.5 ± 9.4             | 2172 ± 464            | 45.9 ± 65.4             |
| PLA70PCL30C5   | 33.96 ± 2.3            | 1814 ± 184            | 108.1 ± 38.0            |
| PLA70PCL30C7.5 | 32.2 ± 3.28            | 2001 ± 136            | 43.9 ± 35.4             |
| PLA70PCL30C10  | 31.3 ± 5.9             | 2110 ± 270            | 50.6 ± 35.9             |
| PLA60PCL40C5   | 31.3 ± 3.9             | 1691 ± 276            | 535.6 ± 355.1           |
| PLA60PCL40C7.5 | 37.6 ± 2.7             | 1958 ± 229            | 137.2 ± 67.1            |
| PLA60PCL40C10  | 34.8 ± 5.6             | 1769 ± 113            | 119.9 ± 56.4            |

**Table S5.** Summary of the mechanical properties of LDPE/PCL blends and LDPE/PCL/PE-g-ma blends obtained from tensile tests [30].

| Sample         | Tensile Strength (MPa) | Elastic Modulus (MPa) | Elongation at Break (%) |
|----------------|------------------------|-----------------------|-------------------------|
| LDPE100        | 12.9 ± 1.7             | 289.5 ± 50            | 926 ± 1                 |
| LDPE90PCL10    | 11.6 ± 2.1             | 250.1 ± 20            | 926 ± 1                 |
| LDPE80PCL20    | 12.7 ± 1.1             | 284.3 ± 40            | 926 ± 1                 |
| LDPE70PCL30    | 12.8 ± 1.4             | 340.6 ± 70            | 926 ± 1                 |
| LDPE90PCL10C10 | 11.2 ± 15              | 274.9 ± 30            | 926 ± 1                 |
| LDPE80PCL20C10 | 12.1 ± 1.1             | 295.7 ± 20            | 926 ± 1                 |
| LDPE70PCL30C10 | 12.4 ± 1.1             | 353.7 ± 50            | 488 ± 302               |
| PCL100         | 19.3 ± 1.5             | 327.4 ± 10            | 926 ± 1                 |

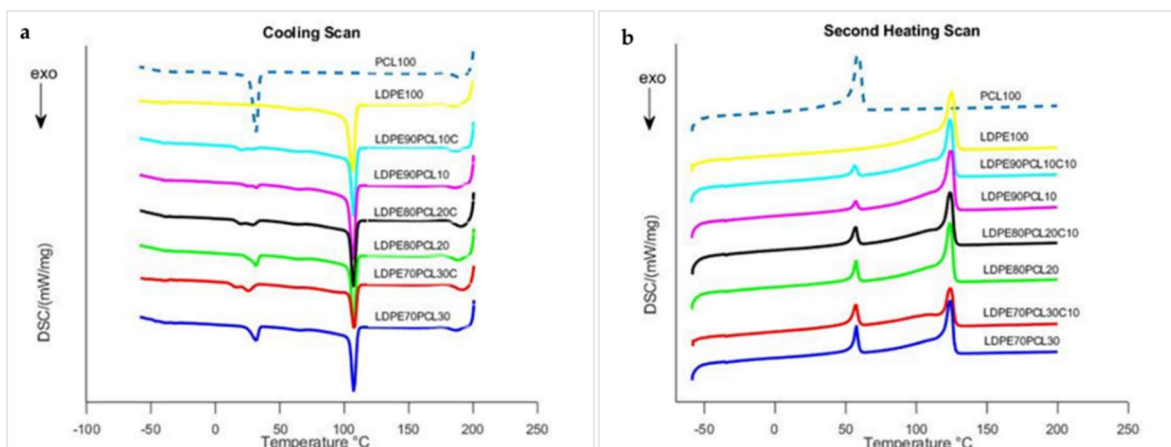

**Figure S1.** DSC plots of LDPE, PCL, LDPE/PCL compatibilized blends: (a) Cooling scans and (b) Second heating scans.

**Table S6.** Thermal parameters of LDPE, PCL, LDPE/PCL, and LDPE/PCL/ PE-g-ma [30].

| Sample         | LDPE          |                  |                              |                                 |              | PCL           |                  |                              |                                 |              |
|----------------|---------------|------------------|------------------------------|---------------------------------|--------------|---------------|------------------|------------------------------|---------------------------------|--------------|
|                | $T_m$<br>(°C) | $T_{mc}$<br>(°C) | $H_m$<br>(Jg <sup>-1</sup> ) | $H_{mc}$<br>(Jg <sup>-1</sup> ) | $X_c$<br>(%) | $T_m$<br>(°C) | $T_{mc}$<br>(°C) | $H_m$<br>(Jg <sup>-1</sup> ) | $H_{mc}$<br>(Jg <sup>-1</sup> ) | $X_c$<br>(%) |
| LDPE100        | 125.7         | 107.2            | 99.85                        | 103.70                          | 34.08        | -             | -                | -                            | -                               | -            |
| LDPE90PCL10    | 124.6         | 107.3            | 93.41                        | 95.23                           | 35.42        | 57.55         | 32.38            | 3.04                         | 2.86                            | 22.37        |
| LDPE80PCL20    | 123.8         | 107.4            | 78.43                        | 85.59                           | 33.46        | 57.40         | 31.31            | 8.56                         | 9.73                            | 31.47        |
| LDPE70PCL30    | 123.7         | 107.2            | 71.18                        | 77.21                           | 34.71        | 57.67         | 31.32            | 11.06                        | 13.08                           | 27.11        |
| LDPE90PCL10C10 | 124.3         | 107.3            | 83.80                        | 92.06                           | 31.78        | 56.56         | 30.50            | 4.44                         | 3.51                            | 32.66        |
| LDPE80PCL20C10 | 124.2         | 107.3            | 75.62                        | 87.13                           | 32.26        | 57.59         | 29.32            | 8.01                         | 8.35                            | 29.46        |
| LDPE70PCL30C10 | 124.7         | 107.3            | 58.47                        | 69.04                           | 28.51        | 57.63         | 26.33            | 10.98                        | 10.45                           | 26.91        |
| PCL100         | -             | -                | -                            | -                               | -            | 58.64         | 32.33            | 65.80                        | 57.31                           | 48.38        |

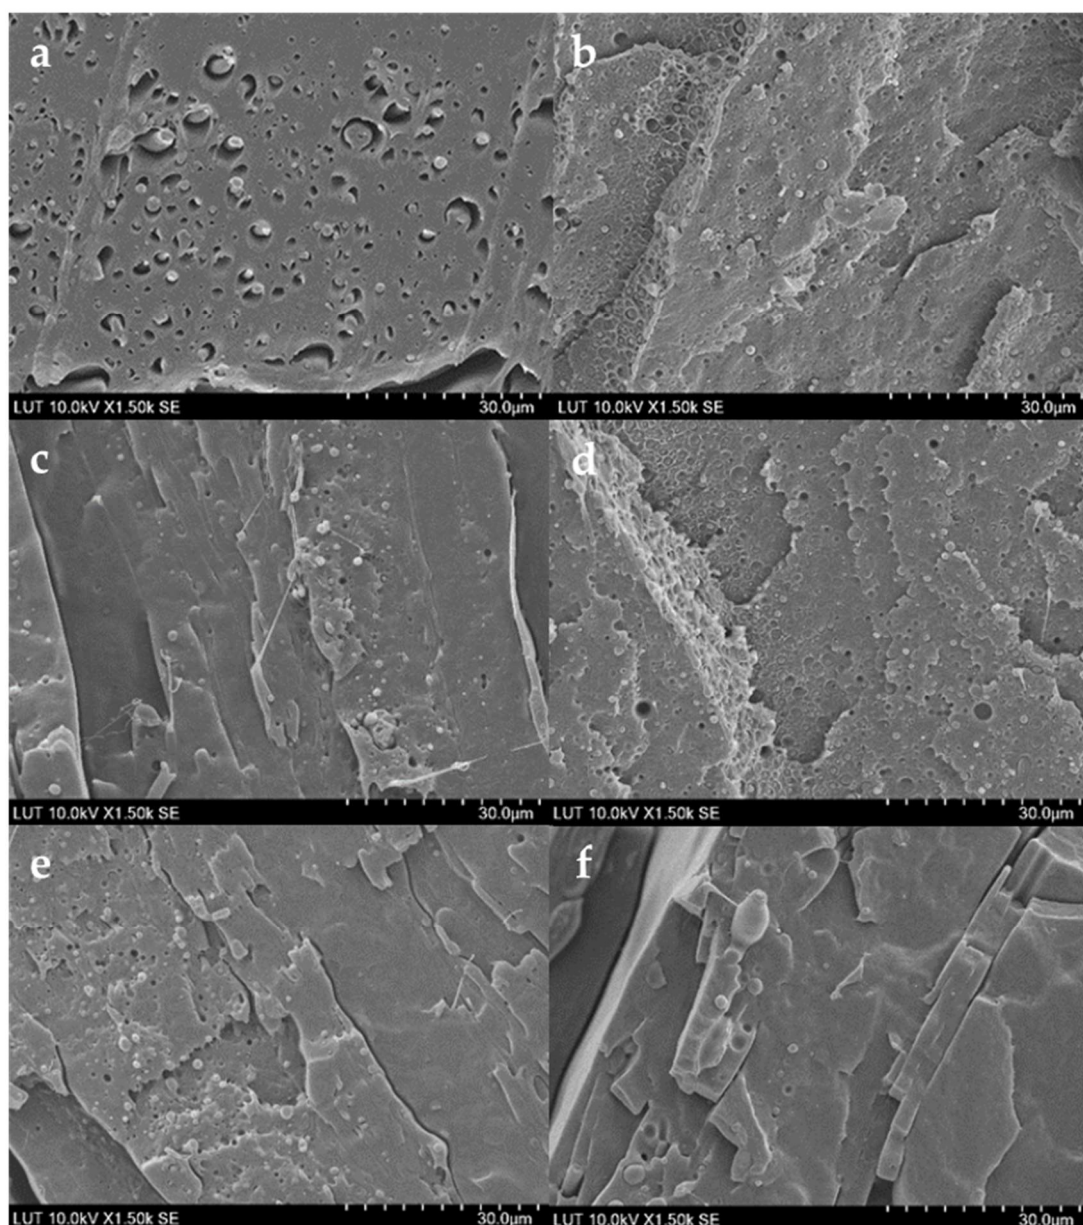

**Figure S2.** SEM images of: (a) LDPE90/PCL10 (b) LDPE90/PCL10C10 (c) LDPE80/PCL20 (d) LDPE80/PCL20C10 (e) LDPE70/PCL30 and (f) LDPE70/PCL30C10 [30].

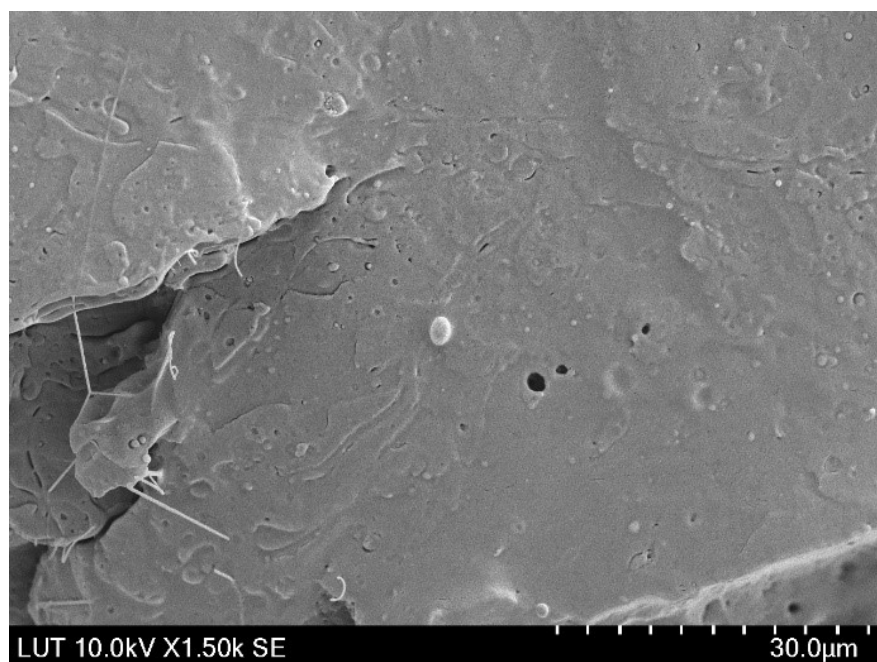

**Figure S3.** SEM image of PLA80/PCL20C5 [30].

**Table S7.** Printing parameters used in printing mask.

| Sample      | Bed Temperature (°C) | Nozzle Temperature (°C) | Raster Angle (°) | Printing Speed (mm/min) | Infill Density (%) |
|-------------|----------------------|-------------------------|------------------|-------------------------|--------------------|
| Mask body   | 50                   | 205                     | 45               | 6000                    | 15                 |
| Other parts | 50                   | 210                     | 45               | 6000                    | 15                 |
